# Supplementary material
Source: PubMed Central journal article supplement (PMC3904796)
Supplement: Supp_Fig1.pdf [file Supp_Fig1.pdf]

## Supplementary Data

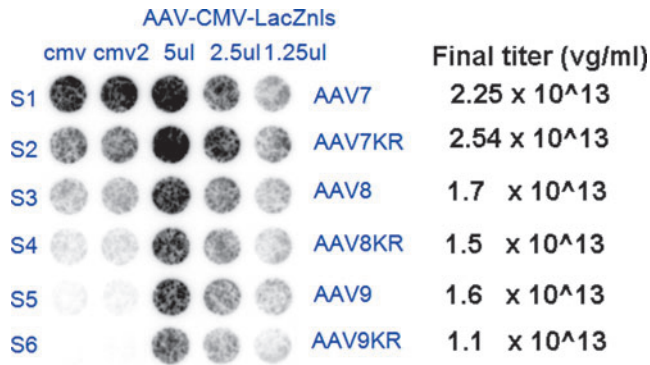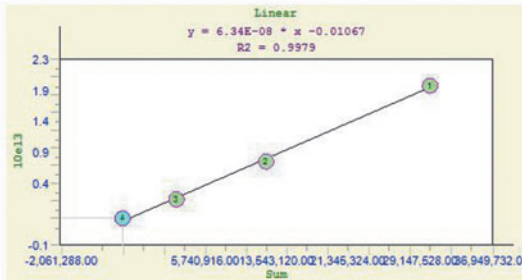

**SUPPLEMENTARY FIG. S1.** Titration of AAV vectors by dot blot DNA hybridization. S1 (standard 1) was loaded with  $5 \times 10^{10}$  molecules total followed by 2-fold dilution. The first two rows were two different plasmid standards driving by the CMV promoter but containing different genes. The blot was hybridized with the CMV probe. The blot was displayed under Fluor Chem M instrument. The standard curve and final virus titer were calculated using AlphaView software. AAV, adeno-associated virus; CMV, cytomegalovirus.
